# Supplementary material for: The triple helix frame for small- and medium-sized enterprises for innovation and development of offshore wind energy
Source: Springer Nature journal article supplement (doi:10.1186/s40604-016-0035-8), 2016-03-30
Supplement: MOESM1 [file 11901890]

# The Triple Helix Frame for Small and Medium-sized Enterprises (SMEs) for Innovation and Development of Offshore Wind Energy T

Tove Brink

المؤسسات المتوسطة والصغرى، الابتكار وتطوير طاقة الرياح "البحرية" فى إطار المراوح الثلاثة  
الكاتب (ة) : Tove Brink  
ملخص

يكشف هذا البحث عن الكيفية التي تمكن المؤسسات المتوسطة والصغرى أن تساهم في الابتكار وفي التقليل في تكلفة الطاقة في مزارع الرياح في الخارج. يعرض البحث استنتاجات دراسة نوعية لعشرة مؤسسات متوسطة وصغرى من اجل فهم اثر إدماج المؤسسات المتوسطة والصغرى في سياق المراوح الثلاثة. تعتمد نظرية المراوح الثلاثة على الإدارة والجامعة والمتدخلين الصناعيين وتشمل عادة المؤسسات الكبرى. تشير الأبحاث إلى أن المؤسسات المتوسطة والصغرى يمكن أن تنضم إلى المراوح الثلاثة ويمكن لكلاهما المساهمة والاستفادة من ذلك. تبين النتائج أن المؤسسات المتوسطة والصغرى تحتاج إلى الوصول إلى أصحاب النفوذ في السوق والمجال الصناعي حتى تتمكن من فهم ومعرفة، واختيار فرص الابتكار في الأعمال التجارية. يمكن للجامعات والوكالات الحكومية والصناعيين إنشاء مساحة للمعرفة تتيح التعلم المتبادل بين المؤسسات المتوسطة والصغرى والشركات الكبيرة في مجال تنظيم المؤسسات مما يؤدي إلى تقدم الابتكار في أساليب خفض تكاليف الطاقة في صناعة شركات الرياح. كما تقدم هذه المساحة للمعرفة نظرة هامة وتمكن من فهم أعمق لكيفية المساهمة الفعالة للحكومة والجامعة في مجال طاقة الرياح البحرية. يبين مردود سياسة الحكومة الحاجة إلى زيادة الدعم على المدى الطويل والاستراتيجي للمعرفة في مجال صناعة طاقة الرياح البحرية. يجب على الوكالات الحكومية ان تعزز بشكل فعال سياسات النمو المبنية على تنظيم المنافسة والتعاون. يمكن للجامعات أن تسهم بشكل فعال في خلق ونشر المعرفة. كما يمكن للمراوح الثلاثة أن تستفيد من هذه النظرية للمؤسسات المتوسطة والصغرى. يجب أن يتم إجراء المزيد من البحوث على المؤسسات المتوسطة والصغرى في سياق المراوح الثلاثة.
